# Supplementary material for: Haplotype variability in mitochondrial rRNA predisposes to metabolic syndrome
Source: PubMed Central journal article supplement (PMC11391015; doi:10.1038/s42003-024-06819-w), 2024-09-11
Supplement: 42003_2024_6819_MOESM2_ESM.pdf [file 42003_2024_6819_MOESM2_ESM.pdf]

# Supplementary Material

Manuscript title:

**Haplotype variability in mitochondrial rRNA predisposes to metabolic syndrome**

Authors:

Petr Pecina<sup>1</sup>, Kristýna Čunátová<sup>1</sup>, Vilma Kaplanová<sup>1</sup>, Guillermo Puertas-Frias<sup>1</sup>, Jan Šilhavý<sup>2</sup>, Kateřina Tauchmannová<sup>1</sup>, Marek Vrbacký<sup>1</sup>, Tomáš Čajka<sup>3</sup>, Ondřej Gahura<sup>4</sup>, Markéta Hlaváčková<sup>5</sup>, Viktor Stránecký<sup>6</sup>, Stanislav Kmoch<sup>6</sup>, Michal Pravenec<sup>2</sup>, Josef Houšťek<sup>1</sup>, Tomáš Mráček<sup>1,\*</sup> and Alena Pecinová<sup>1,\*</sup>

Contents:

**Supplementary Tables 1-3**

**Supplementary Figures 1-9**

**Supplementary table 1.** Amino acid (AA) substitutions caused by mitochondrial DNA variants in mtSHR, mtF344 and mtBN strains.

| OXPPOS gene    | AA No. | mtSHR | mtF344  | mtBN |
|----------------|--------|-------|---------|------|
| <i>mt-Nd2</i>  | 18     | Ala   | Val     | Val  |
|                | 150    | Ser   | Asn     | Asn  |
|                | 244    | Ala   | Ala     | Thr  |
|                | 265    | Thr   | Ala     | Ala  |
|                | 304    | Met   | Thr     | Met  |
|                | 316    | His   | 1AA del | His  |
| <i>mt-Nd4</i>  | 23     | Thr   | Ile     | Ile  |
|                | 356    | Thr   | Ala     | Ala  |
|                | 393    | Ile   | Met     | Ile  |
|                | 401    | Ile   | Val     | Val  |
|                | 405    | Met   | Met     | Ile  |
| <i>mt-Nd6</i>  | 30     | Phe   | Phe     | Leu  |
|                | 139    | Val   | Ile     | Ile  |
| <i>mt-Cytb</i> | 214    | Asn   | Asp     | Asp  |
|                | 334    | Val   | Val     | Ile  |
| <i>mt-Co1</i>  | 2      | Phe   | Phe     | Leu  |
|                | 406    | Asn   | Asp     | Asn  |
| <i>mt-Co2</i>  | 165    | Val   | Ile     | Val  |
| <i>mt-Atp6</i> | 35     | Lys   | Glu     | Glu  |
| <i>mt-Atp8</i> | 58     | Ile   | Ile     | Thr  |

**Supplementary table 2.** Mitochondrial DNA variants in transfer and ribosomal RNA genes in mtF344 and mtBN strains compared to mtSHR. Nucleotide No.: position in mtSHR (genome numbering). NC – no change in sequence with respect to mtSHR sequence.

|         | gene           | Nucleotide No. | mtF344 | mtBN  |
|---------|----------------|----------------|--------|-------|
| mt-tRNA | <i>Phe</i>     | m.32A          | del A  | del A |
|         |                | m.52C          | ins A  | ins A |
|         | <i>Cys</i>     | m.5198G        | G>A    | G>A   |
|         |                | m.5200G        | G>A    | G>A   |
|         | <i>Tyr</i>     | m.5235A        | A>T    | A>T   |
|         |                | m.5267C        | C>G    | C>G   |
|         | <i>Asp</i>     | m.6976A        | A>G    | A>G   |
|         | <i>His</i>     | m.11540A       | NC     | A>G   |
|         | <i>Thr</i>     | m.15331A       | A>G    | NC    |
|         | <i>Pro</i>     | m.15398C       | NC     | C>T   |
| mt-rRNA | <i>mt-Rnr1</i> | m.648C         | NC     | C>A   |
|         |                | m.935G         | G>A    | NC    |
|         |                | m.942T         | T>C    | NC    |
|         | <i>mt-Rnr2</i> | m.1099C        | NC     | C>T   |
|         |                | m.1132C        | del C  | NC    |
|         |                | m.1137C        | C>A    | C>A   |
|         |                | m.1223G        | G>A    | NC    |
|         |                | m.1248T        | T>C    | NC    |
|         |                | m.1521A        | A>G    | A>G   |
|         |                | m.1585C        | C>T    | C>T   |
|         |                | m.1653T        | ins AC | NC    |
|         |                | m.1693T        | NC     | T>C   |
|         |                | m.1716C        | C>T    | C>T   |
|         |                | m.1832A        | A>G    | NC    |
|         |                | m.1918A        | NC     | G>A   |
|         |                | m.2170C        | C>T    | NC    |
| m.2647T | NC             | del T          |        |       |

a)

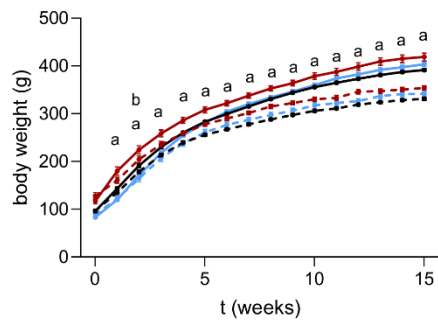

b)

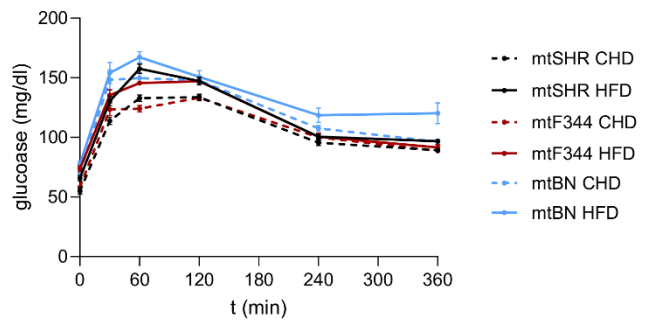

**Supplementary figure 1: Metabolic phenotype of the conplastic strains.** (a) Body weights of mtSHR, mtBN and mtF344 animals during 15 weeks on chow (CHD) or high-fat (HFD) diet. The significant change between mtF344 and mtSHR on HFD diet is depicted as *a* and between mtBN and mtSHR as *b* ( $p$ -value < 0.05) (b) Time course of glycemia during oral glucose tolerance test (OGTT). Data represents means  $\pm$  S.D. from at least 10 animals.

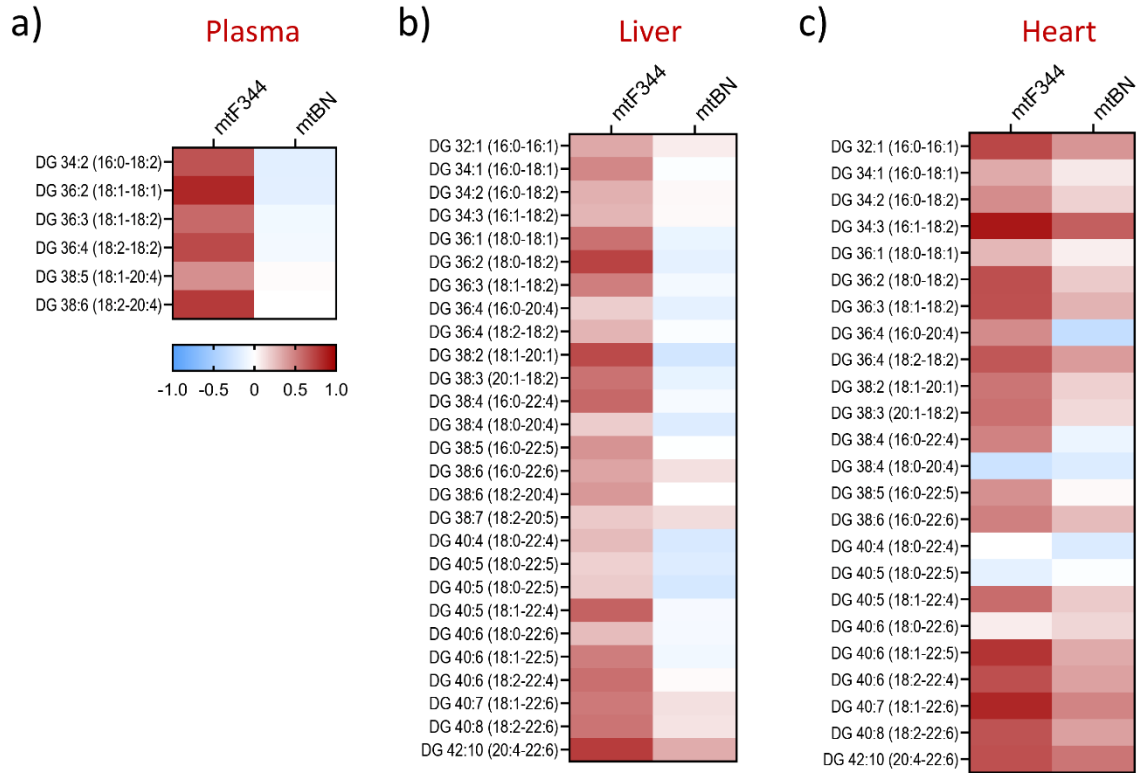

**Supplementary figure 2: LC-MS analysis of individual diacylglycerols in the conplastic strains on HFD.** The heatmap represents average log<sub>2</sub> fold change of individual diacylglycerols compared to mtSHR control in plasma (a), liver (b), and heart (c) of mtF344 and mtBN strains (n = 6).

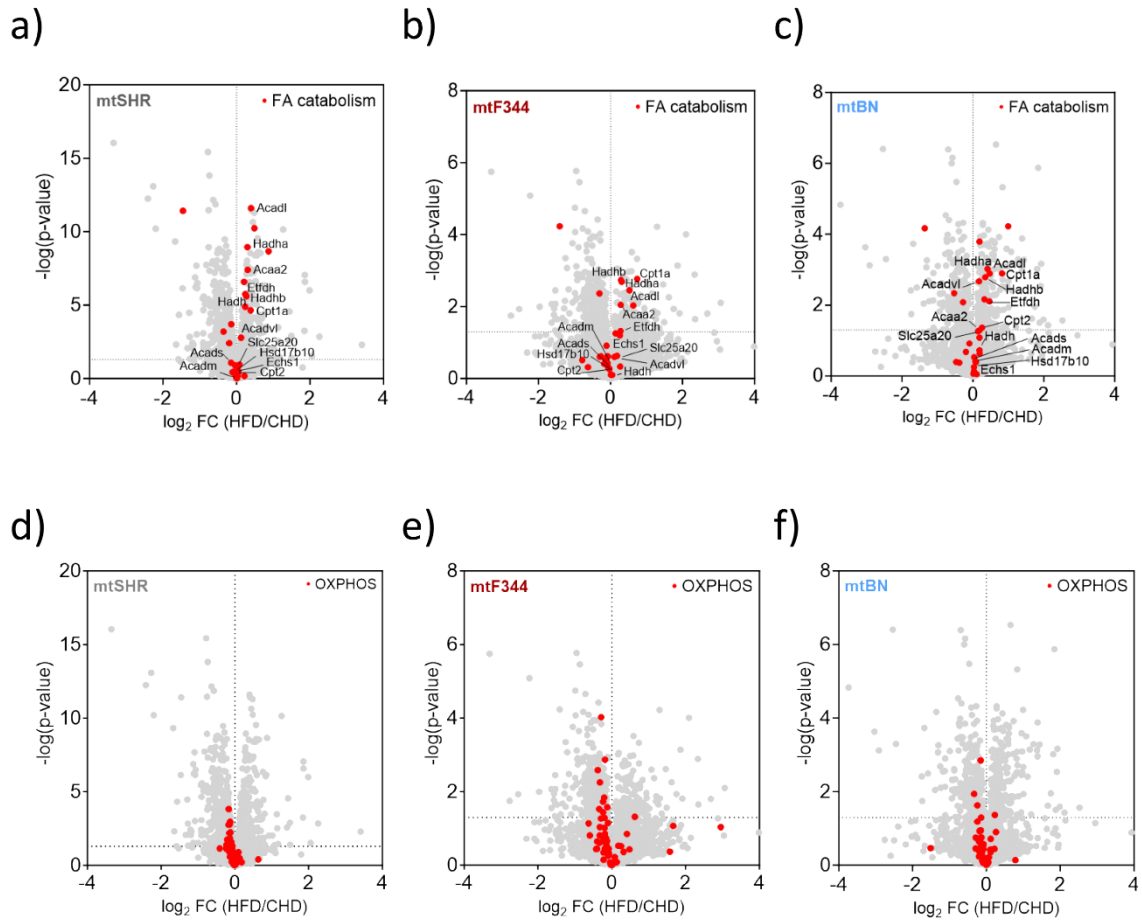

**Supplementary figure 3: Label-free quantification mass spectrometry analysis (LFQ-MS) of liver tissue.** Volcano plots depict differential contents of all proteins in between HFD and CHD in mtSHR (a, d), mtF344 (b, e) and mtBN (c, f). Red circles represent proteins involved in fatty acid (FA) degradation (a-c) and OXPHOS (d-f) according to KEGG pathways, enzymes of mitochondrial β-oxidation are labeled. Each point represents the data from 6 animals.

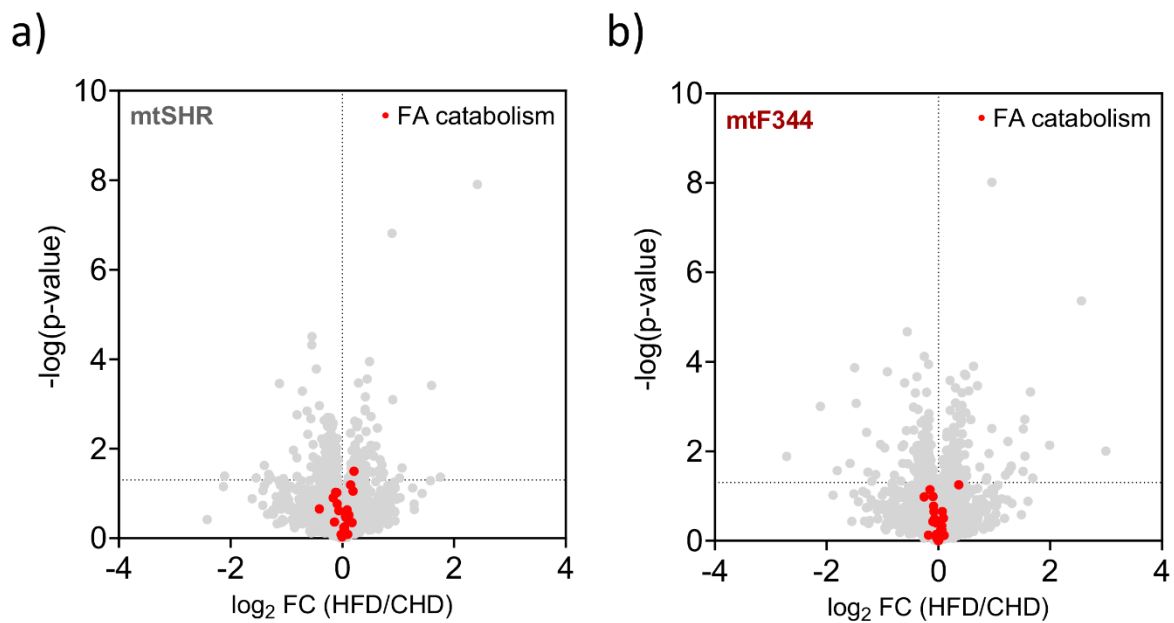

**Supplementary figure 4: Label-free quantification mass spectrometry analysis (LFQ-MS) of heart tissue.** Volcano plots depict differential contents of all proteins in between HFD and CHD in mtSHR (a) and mtF344 (b) strains. Red circles represent proteins involved in fatty acid (FA) degradation (according to KEGG pathways), enzymes of mitochondrial  $\beta$ -oxidation are labeled. Each point represents the data from 6 animals.

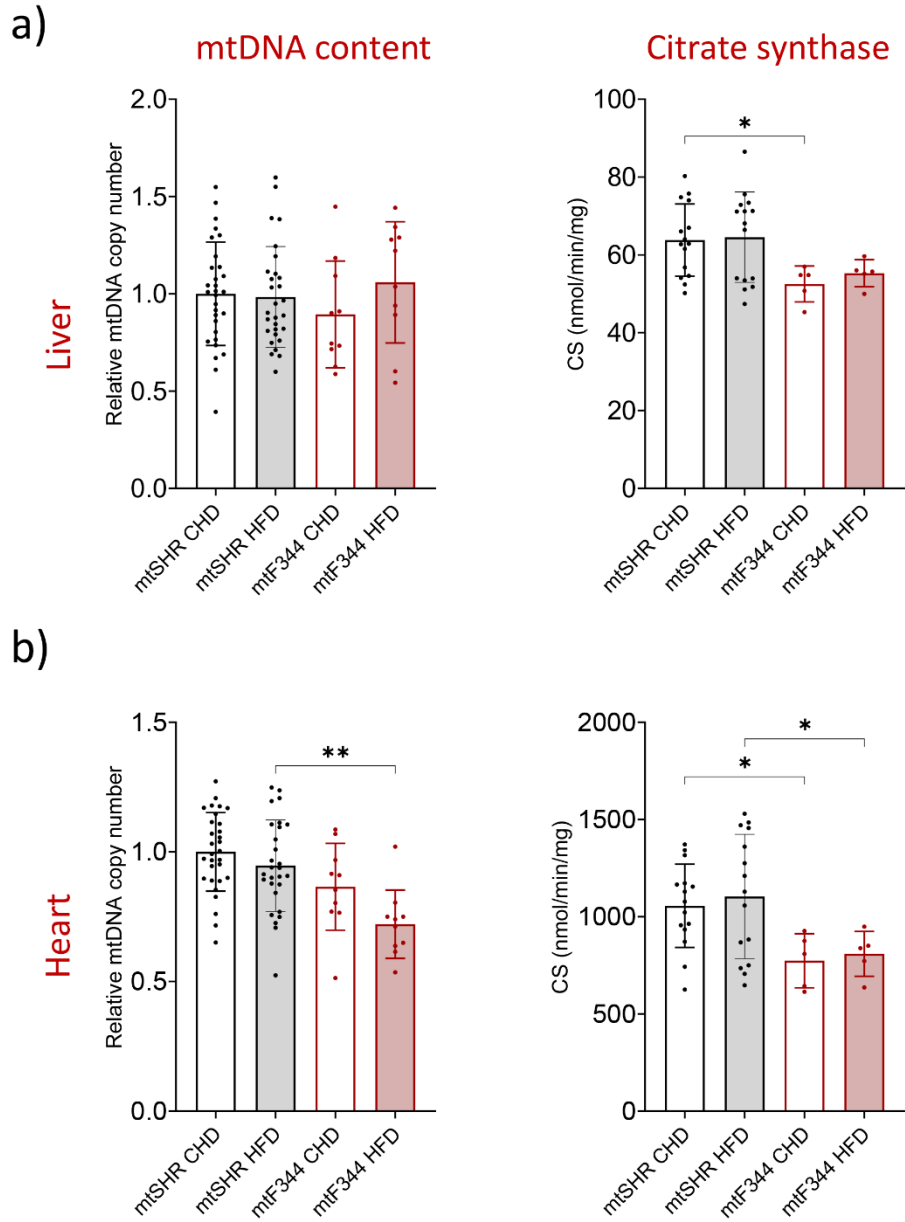

**Supplementary figure 5: Content of mitochondria in mtSHR and mtF344 animals.** Mitochondrial DNA copy number was measured by qPCR and citrate synthase activity (TCA cycle enzyme) was measured spectrophotometrically in liver (a) and heart (b) tissues. The data are expressed as means  $\pm$  S.D. from at least 5 animals.



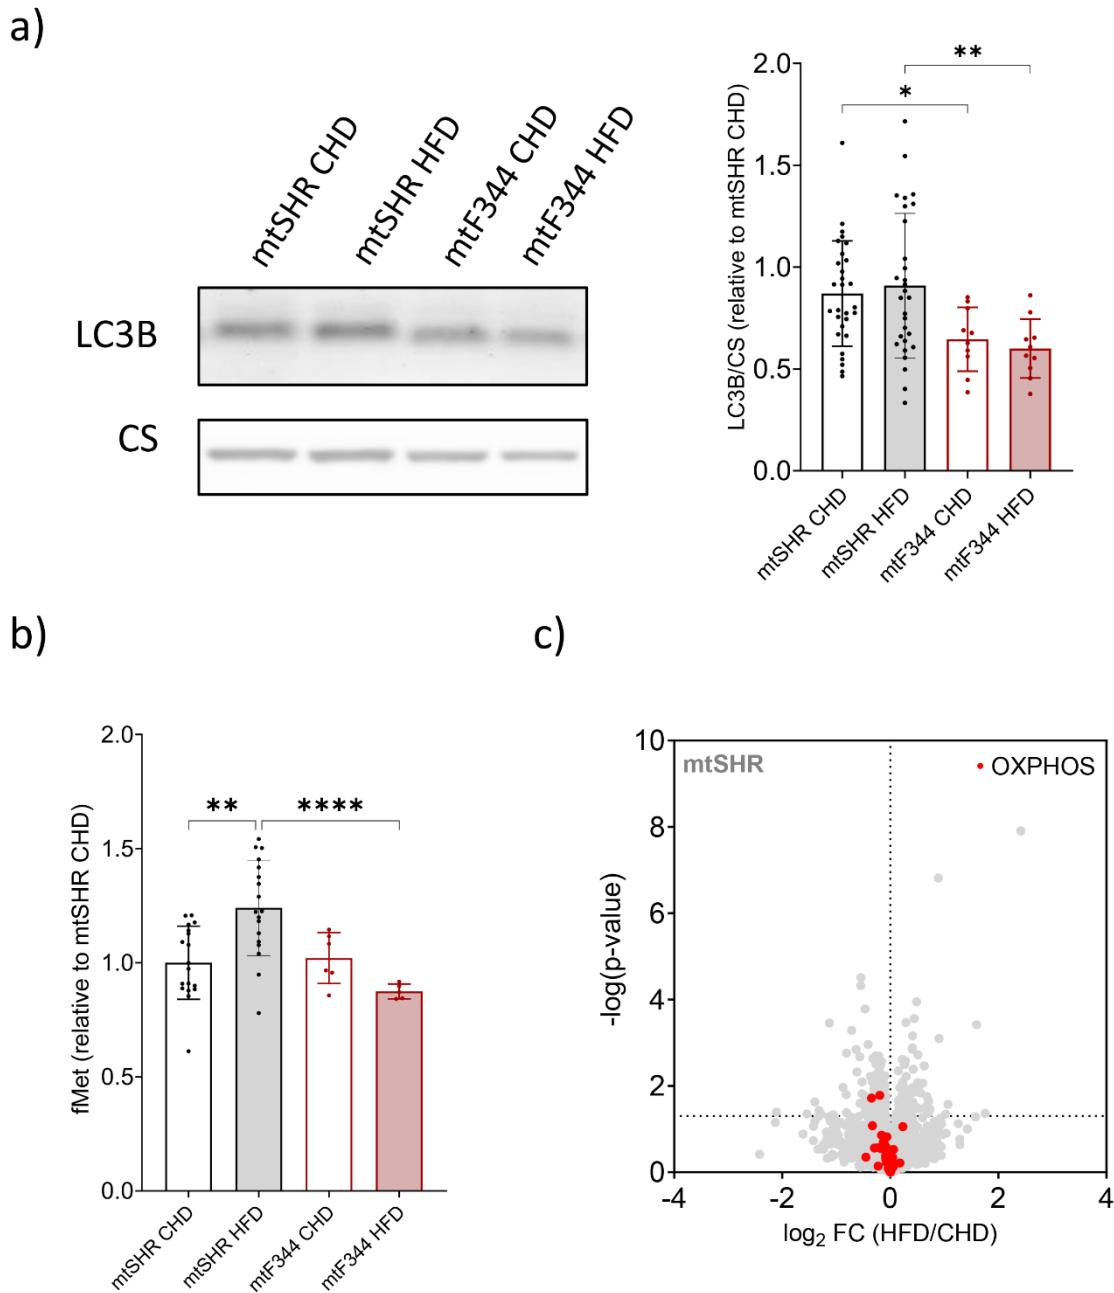

**Supplementary figure 6: Analysis of autophagy and mitochondrial translation initiation in heart tissue of mtSHR and mtF344 animals.** (a) Representative Western blot and quantification of LC3B protein in heart homogenates of at least 10 animals. Graph represents quantification of LC3B normalized to citrate synthase (CS) that was used as a marker of mitochondrial content. (b) The level of N-formylmethionine (fMet) in heart tissue measured by LC-MS metabolomics. The data are expressed as means  $\pm$  S.D. from at least 5 animals. (c) Label-free quantification mass spectrometry analysis (LFQ-MS) of mtSHR heart tissue. Volcano plots depict differential contents of all proteins in between HFD and CHD. Red circles represent subunits of OXPHOS complexes. The data are expressed as means  $\pm$  S.D. and each point represents the data from 6 animals.

a)

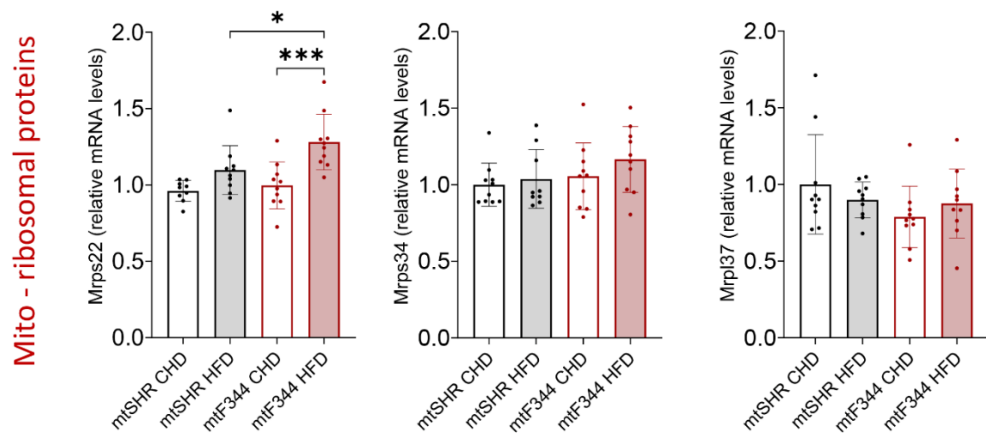

b)

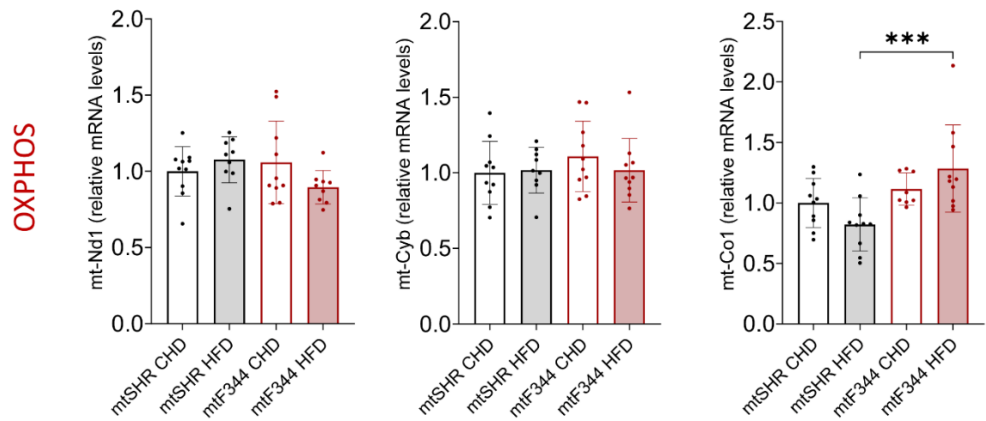

c)

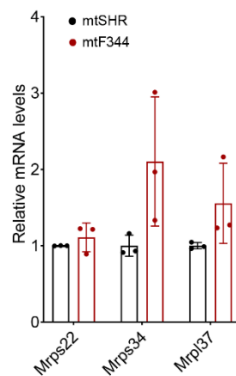

**Supplementary figure 7: Relative mRNA levels of mitochondrial encoded subunits and mitochondrial ribosomal proteins.** Relative mRNA levels of (a) mitochondrial ribosomal proteins encoded by *Mrps22* and *Mrps34* (small mitochondrial ribosomal subunit) and *Mrpl37* (large mitochondrial ribosomal subunit) genes and (b) OXPHOS subunits encoded by *mt-Nd1*, *mt-Cyb* and *mt-Co1* genes in heart of mtF344 and mtSHR on CHD or HFD. Data represents means  $\pm$  S.D. from at least 8 animals. (c) Relative mRNA levels of mitochondrial ribosomal proteins (as in a) in cultured skin fibroblasts derived from mtF344 and mtSHR. Data represents means  $\pm$  S.D. from 3 independent experiments. Asterisks represent p-value: \* < 0.05; \*\* < 0.01; \*\*\* < 0.001; \*\*\*\* < 0.0001.

**Supplementary table 3:** SNP variants unique for SHR strain - indicative of potential heteroplasmic contamination from the founder strain (N – nucleotide).

| position No. |               | mtSHR |                  |              | mtF344 |                  |              | mtBN |                  |              |
|--------------|---------------|-------|------------------|--------------|--------|------------------|--------------|------|------------------|--------------|
| SHR mtDNA    | RN7 reference | N     | coverage (reads) | identity (%) | N      | coverage (reads) | identity (%) | N    | coverage (reads) | identity (%) |
| 1137         | 1137          | C     | 239              | 100          | A      | 384              | 100          | A    | 570              | 100          |
| 1521         | 1521          | A     | 478              | 99           | G      | 357              | 100          | G    | 627              | 100          |
| 1585         | 1585          | C     | 519              | 100          | T      | 367              | 100          | T    | 668              | 100          |
| 1716         | 1716          | C     | 463              | 100          | T      | 340              | 100          | T    | 556              | 100          |
| 4351         | 4352          | G     | 499              | 100          | A      | 390              | 100          | A    | 544              | 100          |
| 4695         | 4696          | A     | 443              | 100          | G      | 387              | 100          | G    | 590              | 100          |
| 5198         | 5200          | G     | 412              | 100          | A      | 288              | 100          | A    | 508              | 100          |
| 5200         | 5202          | G     | 407              | 100          | A      | 289              | 100          | A    | 502              | 100          |
| 5235         | 5237          | A     | 390              | 99           | T      | 258              | 100          | T    | 486              | 100          |
| 5267         | 5269          | C     | 386              | 100          | G      | 243              | 100          | G    | 499              | 100          |
| 6976         | 6978          | A     | 495              | 100          | G      | 408              | 100          | G    | 616              | 100          |
| 8019         | 8021          | A     | 501              | 100          | G      | 387              | 100          | G    | 591              | 100          |
| 10225        | 10227         | C     | 360              | 100          | T      | 295              | 100          | T    | 418              | 100          |
| 11223        | 11225         | A     | 259              | 100          | G      | 216              | 100          | G    | 302              | 100          |
| 11358        | 11360         | A     | 235              | 100          | G      | 197              | 100          | G    | 318              | 100          |
| 14773        | 14775         | A     | 453              | 100          | G      | 386              | 100          | G    | 599              | 100          |

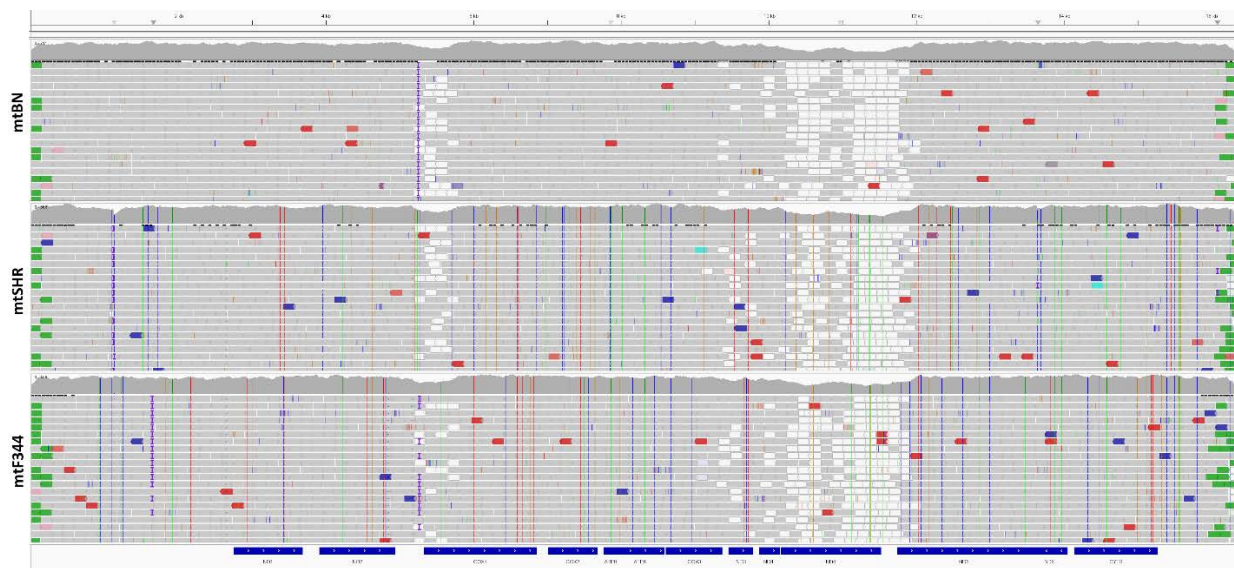

**Supplementary figure 8:** Mapping of individual reads for mtDNA against rn6 reference genome (BN strain based).

a)

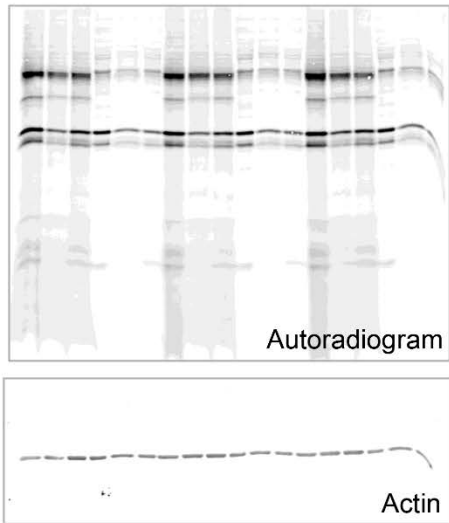

b)

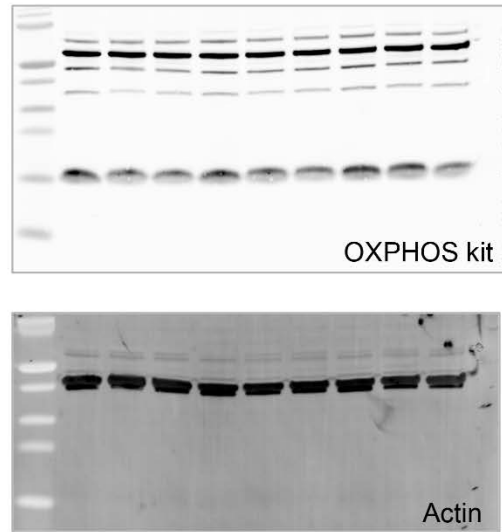

c)

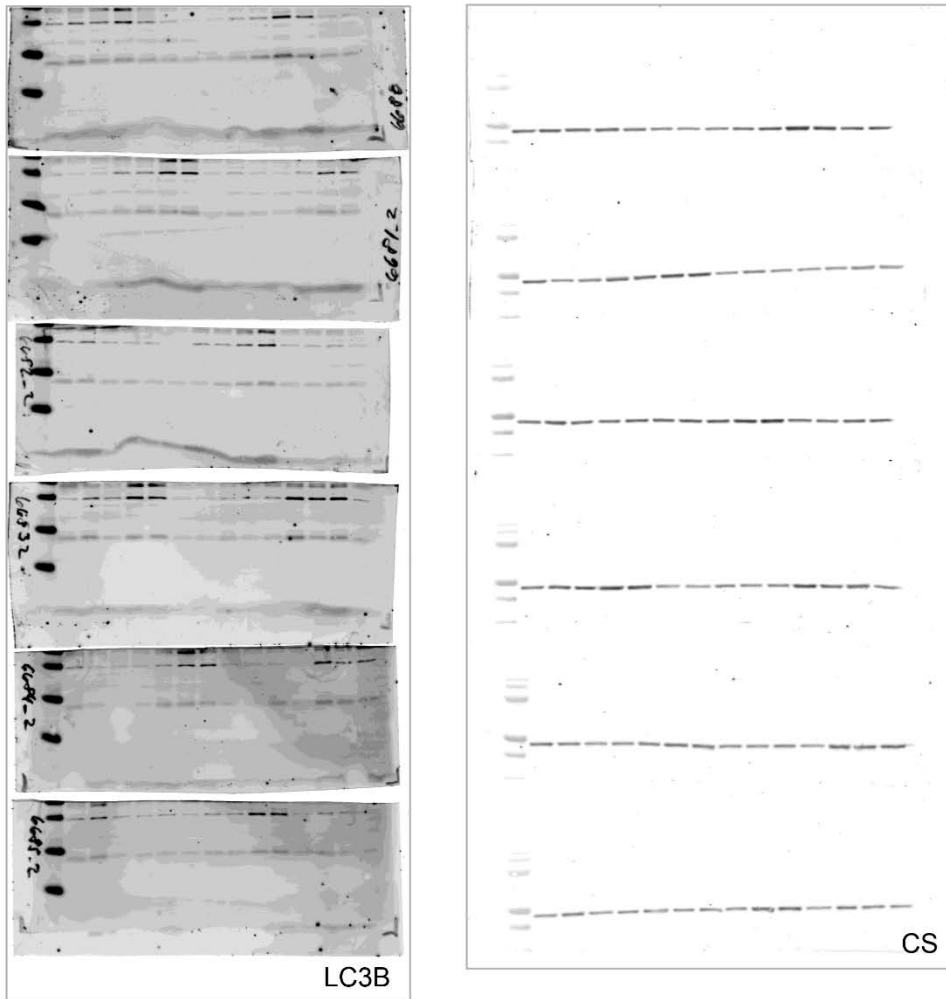

**Supplementary figure 9: Uncropped and unedited Western blots images.** The images were used for analyses in Figure 7a (a), 7c (b) and Supplementary figure 6a (c).
