# Supplementary material for: Haplotype variability in mitochondrial rRNA predisposes to metabolic syndrome
Source: PubMed Central journal article supplement (PMC11391015; doi:10.1038/s42003-024-06819-w), 2024-09-11
Supplement: 42003_2024_6819_MOESM3_ESM.pdf [file 42003_2024_6819_MOESM3_ESM.pdf]

## Description Of Additional Supplementary File

**File name:** Supplementary Data

**Description:** the source data for the graphs in the paper
